# Supplementary material for: The LuWD40-1 Gene Encoding WD Repeat Protein Regulates Growth and Pollen Viability in Flax (Linum Usitatissimum L.)
Source: PubMed Central journal article supplement (PMC3728291; doi:10.1371/journal.pone.0069124), 2013-07-30
Supplement: pone.0069124.s001.pdf [file pone.0069124.s001.pdf]

**A**

GTCAAAGGGTTTTCAAATTCGAGAAAACTAATGAAAGTAATAAGCTAACTTACTGGTATGGTATGTATCGAAAGGCAAAATCCCAAGTTTGAGA  
GATTAGGGTTTTGTCTTTGGTTTTTGTTCGACGAACTGCAGATGAAGCAATGAAACCTAAAATTAGTCTACTATTTATACATGAAGGGATAAAC  
AAATTAAGGAATGCAAGAATAAAAACTTATCTCGATCCGGGCAAGAAATCCTTTGCATGCACGATTCGAACGGATTGTGTGGATTAAGGCATTT  
TTGTCCGCTGAAAGGGTTGATTACGGGTAAGTGTATGATGATATGATGATGGATTTGAAGATAATCGATAGAAAAGGGAGATTTTGGCGGAAAAATTAGG  
GTTTGAGTGTGAATCCTTTGCATGCACGATTCGAACGGATTGTGTGGATTGAGACATTTTGTAGCTGGATACGGGTAAGTGTATGATGATATTG  
ATGATGGATTAGAAGATAATCGACATAAAAGGAAGATTTTGGCGGAAAAATTAGGGTTTGAGTGGCGCTGAATCGAGAGGAAGTCGGCAGAAATTGAG  
AGAAAAATCGAGAGGAGCGTGAAAAATTTGGCAGAAATGAAATCCTAATCTGAAAAATTTAGCTTTTATACCCTATCAATACTACGTCGTTTTAACTC  
CGGATTGGTTGTGGGTCGGATATGTTGCTATCCGTATCCGCCATCAACCGAAACGCACGGATCACGGGCTGACCGAAACCGATAACTATCCGGC  
GGCCATGGCTTCCGGGCTGTATTACGGGCAGGCTCCAATGGGTAATCGAAACCCATGGGCTGCCTGCCAAGCGTACGTCGGATGCCTAAGCCTTGA  
ACCTCCAGTTTTGCATTTCCGCCTATCGGCAGGACTGCTATTTTTCGAATCGAATAAAAGAAGCGGAAGAACAACCTGTAACCTCCATCGTCCCAGGC  
TCTGGACTGAAATTCGGAAGGAGGAAACCTCGCTCCAGGTAACGTAAGCTATTTGGACCCCA

ATGCGCATGGACGCGACGAACTGGGACGAGGTAGCCTATAGAGATAGCATCCTGCGAGAACGAGCAGCCGAAACCTAAACGTCCTTTAGGACGGCA  
M R M D A T N W D E V A Y R D S I L R E R A A E T L N V F R T A

TGGCGCCTTCTTCAGATTTGATCCCTGATGCCATCGTCGTAGCCTCCAGTGACGGGTCGATCAGTTCTGACTCTATATCCTCATGCGCCTCCAAA  
W A P S S D L I P D A I V V A S S D G S I S S Y S I S S C A S K

GTTCCGCTGGGTTTCGGCTCTGCAATGGCTCCACAGGTTGCGCCTACTGCCTTTGTTCAAGGCCATGACGGACCAGCATATGATGTCAAATTTTAT  
V P L G F G S A M A P Q V A P T A F V Q G H D G P A Y D V K F Y

GGCAGCGGCAAGATGCCTTATTGTTGAGTTGTGGTGTATGATGGTCGGATTCGAGGATGGAATGGAAGAATTCATCGAATCTGAGGTTCCAATT  
G S G E D A L L L S C G D D G R I R G W K W K E F I E S E V P I

TCATTGCAAGGAAATCATGTGAATTCAGTTGTTGACCTTGTGAATCCCAACAAGAGGTCATGGGGTGCTCTTTCGCCAGTCCCTGAAAACAAT  
S L Q G N H V N S V V D L V N P Q Q R G P W G A L S P V P E N N

GCTATTGCTTTAGGCACTAAGGACGCTTCCATCTTTTCTGCTGCTGGTGATTCCTGTGCTTATGCTGGGATTTGGAGACGTGCAAGATCAAATG  
A I A L G T K D A S I F S A A G D S C A Y C W D L E T C K I K M

GTTTTCAAGGGGCACTTTGGATTATTTGCACTGTATAGTTGGCCCCAACTCTGCCAATCAGATTATAACTGGGTGCAAGATGGAACAGCAAGATTT  
V F K G H L D Y L H C I V G P N S A N Q I I T G S E D G T A R F

TGGGATGCAATAGTGGGAAGTGTGTCAGAGTAATTGACCCAAAGGATAAGAAGTAAAGAAGACCTTCTATGCCTATTAGATGCATTGCCTT  
W D C N S G K C V R V I D P R K D K K L R R P S M P I R C I A L

GATGCAAGTGACAACCTGGTTGGCTTGTAGCAGCGGTCAAAGTTTATCAGTTTGAACCTGTCATGCTTCTGAGTGTGTTTCGAGGACTTCTACCAGT  
D A S D N W L A C S S G Q S L S V W N L H A S E C V S R T S T S

GGTTCCATGCAGGATATAATATTCGACTACAGTCAAGTATTAGCTGTTGGGTGCAACCTTTTGTGCTGATTTGACCTAGATGGAAGTTTCTA  
G S M Q D I I F D Y S Q V L A V G S K P F V S R F D L D G K F L

TCACAAATACCATGTGCTCCTCAGTCAGCATTTCATTTCCATTTTACATCCATCGGGGCTGACGGCAATTGGAGGTTATGGGGGTGTTGTAGACGTT  
S Q I P C A P Q S A F S I S L H P S G L T A I G G Y G G V V D V

ATATCCCAGGTTCAAAGTCACTATTGCCATTCGGCTGCAGCCGGGGTGA

I S Q V Q S H Y C P F R C S R G \*

AAGATGTAGATTTGGGTGAGTGAAGGCTCATTTTTGGCTGTGGAATACTCGGAAGTTGGGGCTGGAGCAGCAGCAGCAAACTATAACGACATTTT  
GATGTCGGTACCAGACTTTGGAAGAAAGGTGTGGAGTTGATGTTTGAAGTTTAGTTTATACTGTTTGAGCTGTGTGCCTCTGCCTCAGCGTCCT  
GGCCGTTGTTGCTCGTTGTTTATGTTGGCGGCTTGCATCGGTGTAACCAAAATGGTTAACATCAATGGAGCAGCGCAACCAACTAGAAATTTCC  
ATTACAAAACCCACACGAGTATTTCTCGCTGATGAGGTGAGAGAGCTGACCTTTATTTACACTTTTGATAAACTGACCTTTCTTTTAAAAATAAA  
TAACTAGAAGTGAATAAAAAAAAAAAAAAAAAAAAAAAAAAAAAAAAAAAAAAAAAAAG

**B**

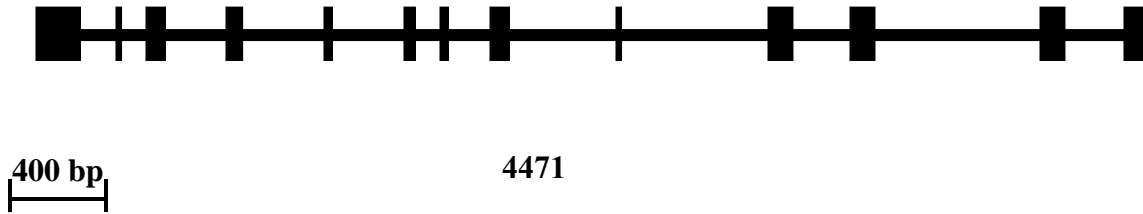

**C**

```
ATGCGCATGGACGCGACGAACCTGGGACGAGGTAGCCTATAGAGATAGCATCCTGCGAGAACGAGCAGCCGAAACCCCTAAACGTCCTTTAGGACGGCAT
GGGCGCCTTCTTCAGATTGATCCCTGATGCCATCGTCGTAGCCTCCAGTGACGGGTGATCAGTTGCTACTCTATATCCTCATGCGCCTCCAAAGT
TGTAAAGTTTCTCTCGCTCTTTGTTTCTTACAATTTCACTTCAGTCAGCTTCCAATAGAGTAGTTTTGCGTCAGTGACGTGATTGAGTTCCTTTAAC
TTTTTTTTTCTTTCTGTGCTCGTTGGTTGGCAATCAGCCGCTGGGTTTCGGCTCTGCAATGGCTCCACAGTAAGTCTAAGCGGCTCTGGTGAC
TGTTCTGACTATAAGCTCCTACTGTCTCTTCTTTGAATTATCATTACTCTGGTTAATTTACAGGGTTGCGCCTACTGCCTTTGTTCAAGGCCATG
ACGGACCAGCATATGATGTCAAATTTTATGGCAGCGGGAAGATGCCTTATTGTTGAGGTCTGTTACTATTTTCTTTCTTTTTCATCATTTTCTTTG
ATTTTGAATCCCATCTACATTCGTGCATTTGAATTCGTAGTCGTGTTGGTTTCAGTAAAGCTGGATTGCATCTATTAGTTTGTAGTTTAGTGCACTG
CTGGTGTGCTGGGTGCTGACACGTAATGTCTATGTTGACCCCAATCTGTATTTCTTGTGACGTATGTATATATATTCGATTCTTGGTATCTGCTTT
ACAGTTGTTGGTGATGATGGTCGGATTTCGAGGATGGAATGGAAGAATTCATCGAATCTGAGGTTCCAATTTTCATTGCAAGTACTAGGCTTAAACG
AAACTGGTATTTTCTTGTAGCTACATCAACATAGAAACCATTGTCTATTCTCATTTATTGGTACGACTGCTTTTCCATCCACCATGACTCCTGATG
TTAATTTAGAGCGTTATTGGTCTCAGCTTGCTCTTGAAGTTCCTGTTTTTGTGTTTGGTATGTATGTCACCTGTTGTTTTATTTCGGAGTTAT
GCTTTAGGGGATAGTTTACAATGCTTGTGATTGACTTCTATGATCTTATGTTCTCTTTTCGGCTAAAAGTTGCTTGCCTTCAAAATCACTGAACAG
GAAATCATGTGAATTCAGTTGTGACCTTGTGAATCCCAACAAAGGTGAGCCATAACTCCTGGCATACTTACGGATGTTACCTTACTTTTAAATT
GATGGCGTTTTTCATAAGCAAGCAGGTCGACACAGTATTGGGTTATGGACTATCATGTTCCATGTTCCCTGGTGGATCAATTACTTTTGACTATAGA
GTGAAATTTCCGTTATTGTGACCTTTGTTTATGGGCCATGGAAGAAGTAAATTTCTTTTGCCATAGGGTTGACATCGTCTAAAACCTCTCGCAAATTT
TTAATTTGATTTATTTTGTGTTTATGTTGCTTTCAGAGGTCATGGGGTGCTCTTTTCGCCAGTCCCTGAAAACAATGCTATTGCTTTAGGCACTAAGG
TTTGACTCCTATACATAATATATTTCCAAGTCCCAATTTGAACAAAAATATATTGTTTAAACATTTTGTGTTTCATTAGGACGCTTCCATCTTTTC
TGCTGCTGGTGATTCTTGTGCCATTGCTGGGATTGTTGATGTATTTGCTCAAGTGAATTTATCGTTGCTATCACATGATACATGCAGCACTATTAC
TTACATATAAGCGTATAGAATGACCATTATGTTTGTAGCCATTTCAATAACTGGGATTATTATTAATGTTTCTACCACTACTTTTGTGCTTTCCA
GGAGACGTGCAAGATCAAATGTTTTCAAGGGGCACTTGATTATTTGCACTGTATAGTTGGCCCCAACTCTGCCAATCAGTAATATTCTATTGCT
CTTCACCATTTATTCTATTGGTGAATTAACATCAAGCTTTTCTTAAAATGGTGAATGTCCTCCAAAGGAAATTCGATTTAAGTGGATTGTTAAATT
GCTGCATAGAAAACCTTTCTAGGCAAGTACTCTCTTAATTTCTGGGTACACGAGATCCACAAAAGTTTTCAGGTAGTCATCAGTTAGAAAAAAATAC
GCCGTTAGCGAATGTTGTATCATTTGATTTGTTGTCATGAAATCTGCAAGATAATGTGATCAATGCTATAAAAACATTTACACTGTTCCGATAGATT
TTTCATTCAAATTTCCAATATCAGCCTTATTTATGATAATCTATTTAGCCGCTTATTTATTTGTTGTAGACAGTGAACCTGATTGTCCTCCGTTTCCC
TTACTCTCAGATTATAACTGGGTCAGAAGATGGAACAGCAAGATTTTGGGGTAAATACTGCTTTTGAATATTGACAATCCATGCTTAAAATCAAGAG
AATGTGCCTCACTTGTGTTTGAATGTGTTAGTTCATAAATAAAATGCTGTTAGAGGCAATGGTGGGAAATCTTCAATTGTGTGTTTTTCATGTTT
ATTGATCTGGTCCAAGACCCCCATAAGTCATGCAGTTAGGGGATACAATTAGAATGGTCATTAGTTTGGGCGACTGGATTATTTACTTCTTAATTTG
GTATTATTTGGATATTTTAAACAGTTTTAGTTTCTCCAGATCAGATTATAAGATCGTCTTCTTTGGCTTCCTTGTGAGGTATAAAATATTGCTTTGCA
GTTGCCCCGGTTTTCTCCTTTCCCATGAGTACGGGAAGGCATTTGTTGATGTGGCTGAGCAATGCTTTCCCTGTTTTTGTGATGGTTTGTATA
GCAATACTATTGGCAATGTAATGCCAATTATGGCTTTAAAGCCGACCTTTACCAGTGTGTTGATGTTTCAGTCATGCCATTGCCTGGATTTTATTA
TTCTCTACTACTTTTTGTCTGATGAAATAGAATTGGCGTTTTTAGATTGCAATAGTGGGAAGTGTGTGAGAGTAATTGACCCAAGGAAGGATAAGAA
GTTAAGAAGACCTTCTATGCCTATTAGATGCATTGCACCTGATGCAAGTGACAACCTGGTTGTAAGTGTTTTTTGTGCTGACAGATTGTACAAGTTAGA
AAAGTGTGATCTTCTACCTTAGATAGGTCTCTTGTATATATGAGAATTAACCGTGCATCAATAACATAACGAAAAAGTTGGCACTCGTAGTTAGGA
AGAGGAGCTGATACATTCCTCTGCCCTAGCCTGTACTGTGGTTAATGGTGGCCTATAAAATGCATTTTCTATGTTTCATAGGCTTGTAGCAGCGGTC
AAGTTTATCAGTTTGAAGTTCATGCTTCTGAGTGTGTTTCGAGGACTTCTACCAGTGGTTCCATGCAGGATATAATATTGACTACAGTCAAGTA
AGGCAATTTCTCCCTAGTTGACCTCAAATAATCATATGCAGCTTAAATGACCAGGTATCAAATGGAATTTGCATACCATTATTAATATATCTT
TTCAGTAGTTAGGGTATAAGTATAACTGTATAATATCTTTCAATTTTCAAAAAGCACCTTGGTTGTGGAGGTGCTGGGTTTGGGGATTTGCTTATGAT
```

TGCAGTTGAAAGTACAAATCCAATTTGTAGGATCCAGAATCAGAATTTGGAATTTTGAACCTGAAGCATGCATTACATTTACCTTTCCTTGAGTCG  
ATTACACAAATAGACAAACTGACGGCTGATCATGAGTTGATGTGTATTTTAACTATCTGGGAATTATCGTGCTAACCTTATGCCAATCAGGTTAGC  
TGTACCTTCCATTTCTTCAACCATGGTTATTTTCGATGATCTCATGTTTCGTGTCCCATGGTTAACTTAGACACCGGTGATTGATACACCCGTTCA  
TTGAACGTATGATTGGTACTGCAGTGGACACCCTTTAGGTGGCGTGTTAAACCTAGTGTCTTTCCTGTGTTGACTCTTTTTTGCCATTTTCTTAA  
CATTCTTTCTTTGAGCGGGAGTTGCTGCGTTTGTGACCTCTAAAAATTGTTGCATTATGCAATCTCAGGTATTAGCTGTTGGGTCGAAACCTTTT  
GTCAGTCGATTTGACCTAGATGGAAAGTTTCTATCACAAATACCATGTGCTCCTCAGTCAGCATTCTCCATCTCATTACATCCATCGGGGGTATTCT  
CTTTTACTTTGACCGAATCTTGGCGTTTCTTGTCTGTGTTTTGGTAGCTGACATTTTCATATATAACATAATCTACCAGAAGTCGTCGTGTTACTTT  
TCTATTGTCGAACAAATAATGTGAACCTAAGGGAAGAAAAGAGATATATTGTATACCAATTAGTAATTTGTTTCTAATGTATTGAAATCTGACATTA  
ATTTTTGGGGTACAGCTGACGGCAATTGGAGGTTATGGTGGTGTGTAGACGTGATATCCCAGGTTCAAAGTCACTATTGCACATTCGCTGCAGC  
CGGGGGTGA

**Figure S1** Sequence and schematic representation of the LuWD40-1 protein encoded by cDNA clone LuP1225D10. (A) Nucleotide and deduced amino acid sequence of *LuWD40-1* with 5' and 3' untranslated regions. The second in frame ATG selected in the *ab initio* annotation of *Lus10011938* is italicized. The 5' region amplified for semi-quantitative RT-PCR experiment is underlined (B) Schematic representation of the genomic clone corresponding to *LuWD40-1* ORF drawn to scale. The boxes represent exons and lines represent introns. (C) DNA sequence of the genomic clone representing the open reading frame of *LuWD40-1*
