# Supplementary material for: The LuWD40-1 Gene Encoding WD Repeat Protein Regulates Growth and Pollen Viability in Flax (Linum Usitatissimum L.)
Source: PubMed Central journal article supplement (PMC3728291; doi:10.1371/journal.pone.0069124), 2013-07-30
Supplement: pone.0069124.s004.pdf [file pone.0069124.s004.pdf]

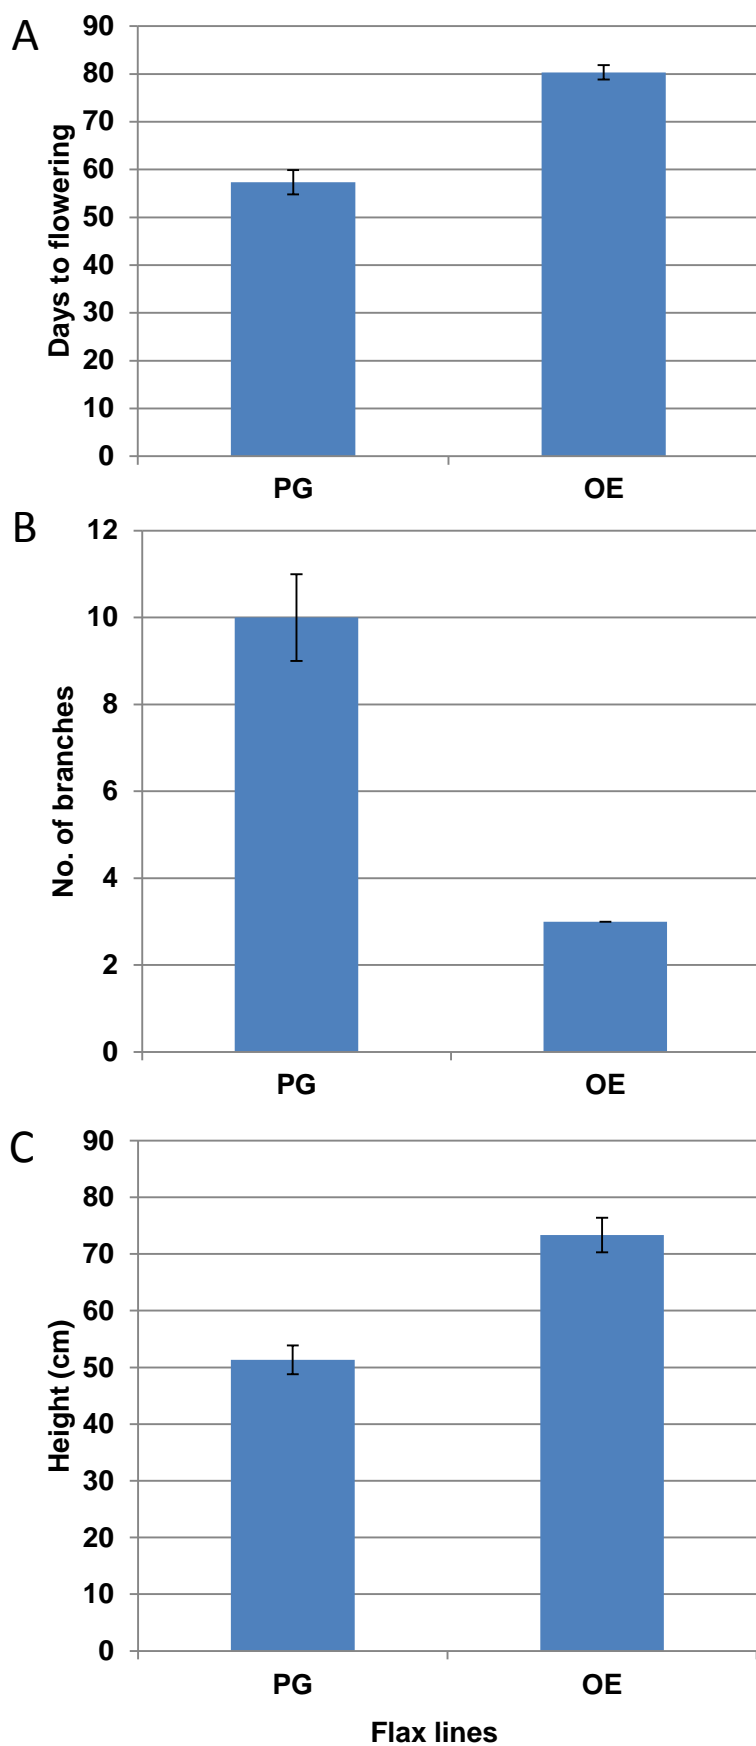

**Figure S4** Physiological characterization of three *LuWD40-1* transgenic lines. Graphs showing differences between Prairie Grande (PG) and overexpressing (OE) lines in physiological parameters: (A) bolting time, (B) branching and (C) height of the plants
