# Supplementary material for: The LuWD40-1 Gene Encoding WD Repeat Protein Regulates Growth and Pollen Viability in Flax (Linum Usitatissimum L.)
Source: PubMed Central journal article supplement (PMC3728291; doi:10.1371/journal.pone.0069124), 2013-07-30
Supplement: pone.0069124.s005.pdf [file pone.0069124.s005.pdf]

Table S1 Transcription factor binding sites in the putative *LuWD40-1* promoter.  
Sequence Length=1558bp

| Factor                 | Site | Strand | Seq                 | Species     | Source   |
|------------------------|------|--------|---------------------|-------------|----------|
| <a href="#">AGL3</a>   | 403  | -      | agtgtgccatATGGgatt  | Arabidopsis | TRANSFAC |
| <a href="#">AGL3</a>   | 405  | +      | tgtGCCATAtgggatttg  | Arabidopsis | TRANSFAC |
| <a href="#">AGL3</a>   | 902  | +      | aatCCATAacaatcagt   | Arabidopsis | TRANSFAC |
| <a href="#">AGL3</a>   | 1383 | +      | caaaCCATaacttaaac   | Arabidopsis | TRANSFAC |
| <a href="#">AG</a>     | 134  | +      | aggaC AAAaaggagggc  | Arabidopsis | TRANSFAC |
| <a href="#">AG</a>     | 1378 | +      | attaCCAAAccatatact  | Arabidopsis | TRANSFAC |
| <a href="#">ANT</a>    | 188  | -      | agTCGGGtaggaag      | Arabidopsis | TRANSFAC |
| <a href="#">Athb-1</a> | 151  | -      | ccagATAATagggg      | Arabidopsis | TRANSFAC |
| <a href="#">Athb-1</a> | 214  | -      | ccaATAATgcaac       | Arabidopsis | TRANSFAC |
| <a href="#">Athb-1</a> | 317  | -      | atcaATAATctaata     | Arabidopsis | TRANSFAC |
| <a href="#">Athb-1</a> | 1030 | +      | gacagATTATtaag      | Arabidopsis | TRANSFAC |
| <a href="#">ATHB-5</a> | 216  | -      | cAATAAtgc           | Arabidopsis | TRANSFAC |
| <a href="#">ATHB-5</a> | 319  | -      | cAATAAtct           | Arabidopsis | TRANSFAC |
| <a href="#">ATHB-5</a> | 578  | +      | ttgTTATTc           | Arabidopsis | TRANSFAC |
| <a href="#">ATHB-5</a> | 779  | +      | agtTTATTa           | Arabidopsis | TRANSFAC |
| <a href="#">ATHB-5</a> | 952  | +      | ttgTTATTt           | Arabidopsis | TRANSFAC |
| <a href="#">ATHB-5</a> | 1033 | +      | agaTTATTa           | Arabidopsis | TRANSFAC |
| <a href="#">ATHB-5</a> | 1294 | +      | attTTATTa           | Arabidopsis | TRANSFAC |
| <a href="#">ATHB-9</a> | 322  | +      | taatctaATGATtgataac | Arabidopsis | TRANSFAC |
| <a href="#">ATHB-9</a> | 350  | +      | ggtatgaATGATgttacgg | Arabidopsis | TRANSFAC |
| <a href="#">ATHB-9</a> | 516  | -      | gggcaacATCATtttcagg | Arabidopsis | TRANSFAC |
| <a href="#">ATHB-9</a> | 885  | +      | tcatgtaATGATgattaaa | Arabidopsis | TRANSFAC |
| <a href="#">ATHB-9</a> | 888  | +      | tgtaatgATGATtaaacc  | Arabidopsis | TRANSFAC |
| <a href="#">CDC5</a>   | 1178 | +      | accTCAGCagt         | Arabidopsis | TRANSFAC |
| <a href="#">PIF3</a>   | 69   | +      | gattagCACGTtcattag  | Arabidopsis | TRANSFAC |
| <a href="#">RAV1</a>   | 45   | +      | attCAACAtagc        | Arabidopsis | TRANSFAC |
| <a href="#">RAV1</a>   | 516  | +      | gggCAACAtcat        | Arabidopsis | TRANSFAC |
| <a href="#">RAV1</a>   | 1198 | -      | agacTGTTGtca        | Arabidopsis | TRANSFAC |
| <a href="#">RAV1</a>   | 1218 | +      | gatCAACAccaa        | Arabidopsis | TRANSFAC |
| <a href="#">RAV1</a>   | 1224 | +      | cacCAACAAAat        | Arabidopsis | TRANSFAC |
| <a href="#">RAV1</a>   | 1338 | +      | aaaCAACAacca        | Arabidopsis | TRANSFAC |
| <a href="#">RAV1</a>   | 1481 | +      | acaCAACAttca        | Arabidopsis | TRANSFAC |
| <a href="#">GAmyb</a>  | 13   | +      | CAACCaat            | Barley      | TRANSFAC |
| <a href="#">GAmyb</a>  | 530  | -      | tcaGGTTG            | Barley      | TRANSFAC |
| <a href="#">GAmyb</a>  | 1344 | +      | CAACCaca            | Barley      | TRANSFAC |
| <a href="#">GAmyb</a>  | 1360 | -      | gcaGGTTG            | Barley      | TRANSFAC |
| <a href="#">Dof1</a>   | 750  | +      | agaTAAAGgat         | Maize       | TRANSFAC |

|                             |      |   |                   |         |          |
|-----------------------------|------|---|-------------------|---------|----------|
| <a href="#">Dof1</a>        | 935  | - | caaCTTTAcat       | Maize   | TRANSFAC |
| <a href="#">Dof1</a>        | 1079 | - | taaCTTTAaca       | Maize   | TRANSFAC |
| <a href="#">Dof2</a>        | 35   | + | ggtcAAAGCca       | Maize   | TRANSFAC |
| <a href="#">Dof2</a>        | 96   | + | tttcAAAGCta       | Maize   | TRANSFAC |
| <a href="#">Dof2</a>        | 429  | - | agGCTTTcaaa       | Maize   | TRANSFAC |
| <a href="#">Dof2</a>        | 640  | + | caaaAAAGCat       | Maize   | TRANSFAC |
| <a href="#">Dof2</a>        | 685  | + | caaaAAAGCag       | Maize   | TRANSFAC |
| <a href="#">Dof3</a>        | 35   | + | ggtcAAAGCca       | Maize   | TRANSFAC |
| <a href="#">Dof3</a>        | 96   | + | tttcAAAGCta       | Maize   | TRANSFAC |
| <a href="#">Dof3</a>        | 429  | - | agGCTTTcaaa       | Maize   | TRANSFAC |
| <a href="#">Dof3</a>        | 640  | + | caaaAAAGCat       | Maize   | TRANSFAC |
| <a href="#">Dof3</a>        | 685  | + | caaaAAAGCag       | Maize   | TRANSFAC |
| <a href="#">O2</a>          | 80   | + | TCATTagtgttctaaa  | Maize   | TRANSFAC |
| <a href="#">O2</a>          | 299  | - | aaacatgtggaAATGA  | Maize   | TRANSFAC |
| <a href="#">O2</a>          | 317  | - | atcaataatctAATGA  | Maize   | TRANSFAC |
| <a href="#">O2</a>          | 345  | - | atattggtatgAATGA  | Maize   | TRANSFAC |
| <a href="#">O2</a>          | 437  | - | aaaaatccatgAATGA  | Maize   | TRANSFAC |
| <a href="#">O2</a>          | 524  | + | TCATTtcagggttgggt | Maize   | TRANSFAC |
| <a href="#">O2</a>          | 672  | + | TCATTgaagaagacaa  | Maize   | TRANSFAC |
| <a href="#">O2</a>          | 717  | + | TCATTgaagaaggtag  | Maize   | TRANSFAC |
| <a href="#">O2</a>          | 808  | + | TCATTtcatatttga   | Maize   | TRANSFAC |
| <a href="#">O2</a>          | 880  | - | gtcactcatgtAATGA  | Maize   | TRANSFAC |
| <a href="#">PBF</a>         | 138  | + | ccaAAAAGgag       | Maize   | TRANSFAC |
| <a href="#">PBF</a>         | 397  | + | aagAAAAGtgt       | Maize   | TRANSFAC |
| <a href="#">PBF</a>         | 640  | + | caaAAAAGcat       | Maize   | TRANSFAC |
| <a href="#">PBF</a>         | 685  | + | caaAAAAGcag       | Maize   | TRANSFAC |
| <a href="#">PBF</a>         | 798  | + | tttAAAAGatt       | Maize   | TRANSFAC |
| <a href="#">PBF</a>         | 919  | + | tcaAAAAGgat       | Maize   | TRANSFAC |
| <a href="#">P</a>           | 191  | - | cgGGTAGga         | Maize   | TRANSFAC |
| <a href="#">P</a>           | 726  | - | aaGGTAGat         | Maize   | TRANSFAC |
| <a href="#">MYB.Ph3</a>     | 78   | + | gttcatTAGTTtt     | Petunia | TRANSFAC |
| <a href="#">MYB.Ph3</a>     | 489  | + | agggtTAGTTga      | Petunia | TRANSFAC |
| <a href="#">MYB.Ph3</a>     | 780  | + | gtttatTAGTTta     | Petunia | TRANSFAC |
| <a href="#">MYB.Ph3</a>     | 961  | + | cagaatTAGTTtag    | Petunia | TRANSFAC |
| <a href="#">MYB.Ph3</a>     | 1087 | + | acaattTAGTTca     | Petunia | TRANSFAC |
| <a href="#">MYB.Ph3</a>     | 1259 | - | ccAACTAtttgac     | Petunia | TRANSFAC |
| <a href="#">LIM1</a>        | 559  | - | agggtGGTGG        | Tobacco | TRANSFAC |
| <a href="#">LIM1</a>        | 562  | - | gagtggGGTGG       | Tobacco | TRANSFAC |
| <a href="#">TEIL</a>        | 239  | + | ATGTAaat          | Tobacco | TRANSFAC |
| <a href="#">TEIL</a>        | 664  | - | agtTACAT          | Tobacco | TRANSFAC |
| <a href="#">TEIL</a>        | 709  | - | agtTACAT          | Tobacco | TRANSFAC |
| <a href="#">TEIL</a>        | 770  | + | ATGTAata          | Tobacco | TRANSFAC |
| <a href="#">TEIL</a>        | 887  | + | ATGTAatg          | Tobacco | TRANSFAC |
| <a href="#">TEIL</a>        | 938  | - | cttTACAT          | Tobacco | TRANSFAC |
| <a href="#">TEIL</a>        | 1298 | - | tatTACAT          | Tobacco | TRANSFAC |
| <a href="#">TEIL</a>        | 1399 | - | actTACAT          | Tobacco | TRANSFAC |
| <a href="#">-10PEHVPSBD</a> | 593  | + | TATTCT            | Barley  | PLACE    |

|                                  |      |   |          |                                   |        |
|----------------------------------|------|---|----------|-----------------------------------|--------|
| <a href="#">-300CORE</a>         | 956  | - | CTTTACA  | maize/wheat/barley/tobacco        | PLACE  |
| <a href="#">-300CORE</a>         | 956  | - | CTTTACA  | maize/wheat/barley/tobacco        | PLACE  |
| <a href="#">-300CORE</a>         | 956  | - | CTTTACA  | maize/wheat/barley/tobacco        | PLACE  |
| <a href="#">-300CORE</a>         | 956  | - | CTTTACA  | maize/wheat/barley/tobacco        | PLACE  |
| <a href="#">-300ELEMENT</a>      | 955  | - | ACTTTACA | wheat                             | PLACE  |
| <a href="#">ABI4</a>             | 1266 | + | CTGCCTCC | Maize                             | JASPER |
| <a href="#">ABI4</a>             | 1383 | - | AGGAGCAG | Maize                             | JASPER |
| <a href="#">ABI4</a>             | 1522 | - | AAGAGCAG | Maize                             | JASPER |
| <a href="#">ABI4</a>             | 520  | - | GAGGGCGG | Maize                             | JASPER |
| <a href="#">ABI4</a>             | 701  | - | AAAAGCAG | Maize                             | JASPER |
| <a href="#">ABRELATERD1</a>      | 76   | - | CACGT    | Arabidopsis                       | PLACE  |
| <a href="#">ABRERATCAL</a>       | 75   | - | GCACGTT  | Arabidopsis                       | PLACE  |
| <a href="#">ACGTATERD1</a>       | 77   | + | ACGT     | Arabidopsis                       | PLACE  |
| <a href="#">ACGTATERD1</a>       | 77   | - | ACGT     | Arabidopsis                       | PLACE  |
| <a href="#">ANAERO1CONSENSUS</a> | 287  | - | TTTGTTT  | maize/Arabidopsis/pea/barley/rice | PLACE  |
| <a href="#">ANAERO1CONSENSUS</a> | 287  | - | TTTGTTT  | maize/Arabidopsis/pea/barley/rice | PLACE  |
| <a href="#">ANAERO1CONSENSUS</a> | 287  | - | TTTGTTT  | maize/Arabidopsis/pea/barley/rice | PLACE  |
| <a href="#">ANAERO1CONSENSUS</a> | 287  | - | TTTGTTT  | maize/Arabidopsis/pea/barley/rice | PLACE  |
| <a href="#">ANAERO1CONSENSUS</a> | 287  | - | TTTGTTT  | maize/Arabidopsis/pea/barley/rice | PLACE  |
| <a href="#">AP1</a>              | 140  | - | CCAAAAA  | Arabidopsis                       | AGRIS  |
| <a href="#">AP1</a>              | 178  | - | CTAAAAA  | Arabidopsis                       | AGRIS  |
| <a href="#">ARR10</a>            | 1053 | + | AGATTATT | Arabidopsis                       | JASPER |
| <a href="#">ARR10</a>            | 156  | + | AGATAATA | Arabidopsis                       | JASPER |
| <a href="#">ARR10</a>            | 326  | - | AATAATCT | Arabidopsis                       | JASPER |
| <a href="#">ARR10</a>            | 378  | + | AGATACTA | Arabidopsis                       | JASPER |
| <a href="#">ARR10</a>            | 69   | + | AGATTAGC | Arabidopsis                       | JASPER |
| <a href="#">ARR10</a>            | 888  | + | AGATTTGA | Arabidopsis                       | JASPER |
| <a href="#">ARR1AT</a>           | 1053 | + | AGATT    | Arabidopsis                       | PLACE  |
| <a href="#">ARR1AT</a>           | 1132 | - | AATCT    | Arabidopsis                       | PLACE  |
| <a href="#">ARR1AT</a>           | 124  | + | CGATT    | Arabidopsis                       | PLACE  |
| <a href="#">ARR1AT</a>           | 1276 | - | AATCA    | Arabidopsis                       | PLACE  |
| <a href="#">ARR1AT</a>           | 1353 | - | AATCC    | Arabidopsis                       | PLACE  |
| <a href="#">ARR1AT</a>           | 1444 | - | AATCA    | Arabidopsis                       | PLACE  |

|                               |      |   |          |             |        |
|-------------------------------|------|---|----------|-------------|--------|
| <a href="#">ARR1AT</a>        | 1489 | - | AATCT    | Arabidopsis | PLACE  |
| <a href="#">ARR1AT</a>        | 18   | - | AATCA    | Arabidopsis | PLACE  |
| <a href="#">ARR1AT</a>        | 22   | - | AATCA    | Arabidopsis | PLACE  |
| <a href="#">ARR1AT</a>        | 329  | - | AATCT    | Arabidopsis | PLACE  |
| <a href="#">ARR1AT</a>        | 336  | + | TGATT    | Arabidopsis | PLACE  |
| <a href="#">ARR1AT</a>        | 424  | + | GGATT    | Arabidopsis | PLACE  |
| <a href="#">ARR1AT</a>        | 448  | - | AATCC    | Arabidopsis | PLACE  |
| <a href="#">ARR1AT</a>        | 490  | + | TGATT    | Arabidopsis | PLACE  |
| <a href="#">ARR1AT</a>        | 555  | + | GGATT    | Arabidopsis | PLACE  |
| <a href="#">ARR1AT</a>        | 635  | + | TGATT    | Arabidopsis | PLACE  |
| <a href="#">ARR1AT</a>        | 69   | + | AGATT    | Arabidopsis | PLACE  |
| <a href="#">ARR1AT</a>        | 751  | + | AGATT    | Arabidopsis | PLACE  |
| <a href="#">ARR1AT</a>        | 772  | + | GGATT    | Arabidopsis | PLACE  |
| <a href="#">ARR1AT</a>        | 779  | + | AGATT    | Arabidopsis | PLACE  |
| <a href="#">ARR1AT</a>        | 820  | + | AGATT    | Arabidopsis | PLACE  |
| <a href="#">ARR1AT</a>        | 846  | + | GGATT    | Arabidopsis | PLACE  |
| <a href="#">ARR1AT</a>        | 888  | + | AGATT    | Arabidopsis | PLACE  |
| <a href="#">ARR1AT</a>        | 913  | + | TGATT    | Arabidopsis | PLACE  |
| <a href="#">ARR1AT</a>        | 920  | - | AATCC    | Arabidopsis | PLACE  |
| <a href="#">ARR1AT</a>        | 931  | - | AATCA    | Arabidopsis | PLACE  |
| <a href="#">ARR1AT</a>        | 944  | + | GGATT    | Arabidopsis | PLACE  |
| <a href="#">AtMYC2</a>        | 114  | - | CATGTG   | Arabidopsis | AGRIS  |
| <a href="#">AtMYC2</a>        | 308  | - | CATGTG   | Arabidopsis | AGRIS  |
| <a href="#">Athb-1</a>        | 334  | - | AATGATTG | Arabidopsis | JASPER |
| <a href="#">BIHD1OS</a>       | 1229 | + | TGTCA    | rice        | PLACE  |
| <a href="#">BIHD1OS</a>       | 628  | + | TGTCA    | rice        | PLACE  |
| <a href="#">BIHD1OS</a>       | 896  | + | TGTCA    | rice        | PLACE  |
| <a href="#">BOXIINTPATPB</a>  | 1468 | - | TTCTAT   | tobacco     | PLACE  |
| <a href="#">BOXLCOREDCPAL</a> | 543  | - | GGTTGGT  | carrot      | PLACE  |
| <a href="#">C1MOTIFZMBZ2</a>  | 1114 | - | TAGTTCA  | maize       | PLACE  |
| <a href="#">C1MOTIFZMBZ2</a>  | 1284 | + | CCAACTA  | maize       | PLACE  |
| <a href="#">C1MOTIFZMBZ2</a>  | 1410 | + | CAAACCA  | maize       | PLACE  |
| <a href="#">C1MOTIFZMBZ2</a>  | 801  | - | TAGTTTA  | maize       | PLACE  |
| <a href="#">C1MOTIFZMBZ2</a>  | 986  | - | TAGTTAG  | maize       | PLACE  |
| <a href="#">CAATBOX1</a>      | 1014 | + | CAAT     | pea         | PLACE  |
| <a href="#">CAATBOX1</a>      | 1016 | - | ATTG     | pea         | PLACE  |
| <a href="#">CAATBOX1</a>      | 1109 | + | CAAT     | pea         | PLACE  |
| <a href="#">CAATBOX1</a>      | 1131 | + | CAAT     | pea         | PLACE  |
| <a href="#">CAATBOX1</a>      | 1189 | + | CAAT     | pea         | PLACE  |
| <a href="#">CAATBOX1</a>      | 1279 | + | CAAT     | pea         | PLACE  |
| <a href="#">CAATBOX1</a>      | 1344 | - | ATTG     | pea         | PLACE  |
| <a href="#">CAATBOX1</a>      | 1378 | - | ATTG     | pea         | PLACE  |
| <a href="#">CAATBOX1</a>      | 1403 | + | CAAT     | pea         | PLACE  |
| <a href="#">CAATBOX1</a>      | 1452 | + | CAAT     | pea         | PLACE  |
| <a href="#">CAATBOX1</a>      | 17   | + | CAAT     | pea         | PLACE  |
| <a href="#">CAATBOX1</a>      | 21   | + | CAAT     | pea         | PLACE  |
| <a href="#">CAATBOX1</a>      | 220  | + | CAAT     | pea         | PLACE  |

|                                   |      |   |            |             |       |
|-----------------------------------|------|---|------------|-------------|-------|
| <a href="#">CAATBOX1</a>          | 325  | + | CAAT       | pea         | PLACE |
| <a href="#">CAATBOX1</a>          | 338  | - | ATTG       | pea         | PLACE |
| <a href="#">CAATBOX1</a>          | 353  | - | ATTG       | pea         | PLACE |
| <a href="#">CAATBOX1</a>          | 395  | - | ATTG       | pea         | PLACE |
| <a href="#">CAATBOX1</a>          | 588  | - | ATTG       | pea         | PLACE |
| <a href="#">CAATBOX1</a>          | 637  | - | ATTG       | pea         | PLACE |
| <a href="#">CAATBOX1</a>          | 687  | - | ATTG       | pea         | PLACE |
| <a href="#">CAATBOX1</a>          | 733  | - | ATTG       | pea         | PLACE |
| <a href="#">CAATBOX1</a>          | 855  | - | ATTG       | pea         | PLACE |
| <a href="#">CAATBOX1</a>          | 860  | - | ATTG       | pea         | PLACE |
| <a href="#">CAATBOX1</a>          | 930  | + | CAAT       | pea         | PLACE |
| <a href="#">CAATBOX1</a>          | 970  | - | ATTG       | pea         | PLACE |
| <a href="#">CATATGGMSAUR</a>      | 418  | + | CATATG     | soybean     | PLACE |
| <a href="#">CATATGGMSAUR</a>      | 418  | - | CATATG     | soybean     | PLACE |
| <a href="#">CATATGGMSAUR</a>      | 624  | + | CATATG     | soybean     | PLACE |
| <a href="#">CATATGGMSAUR</a>      | 624  | - | CATATG     | soybean     | PLACE |
| <a href="#">CCA1ATLHCB1</a>       | 1129 | + | AACAATCT   | Arabidopsis | PLACE |
| <a href="#">CCA1</a>              | 1129 | + | AACAATCT   | Arabidopsis | AGRIS |
| <a href="#">CCAATBOX1</a>         | 1451 | + | CCAAT      | Soybean     | PLACE |
| <a href="#">CCAATBOX1</a>         | 16   | + | CCAAT      | Soybean     | PLACE |
| <a href="#">CCAATBOX1</a>         | 219  | + | CCAAT      | Soybean     | PLACE |
| <a href="#">CCAATBOX1</a>         | 860  | - | ATTGG      | Soybean     | PLACE |
| <a href="#">CEREGLUBOX1PSLEGA</a> | 1102 | - | ACTTTAACA  | pea         | PLACE |
| <a href="#">CIACADIANLELHC</a>    | 885  | - | GATAGATTTG | tomato      | PLACE |
| <a href="#">CPBCSPOR</a>          | 798  | + | TATTAG     | cucumber    | PLACE |
| <a href="#">Core</a>              | 1055 | + | ATTA       | Arabidopsis | AGRIS |
| <a href="#">Core</a>              | 1058 | + | ATTA       | Arabidopsis | AGRIS |
| <a href="#">Core</a>              | 1088 | - | TAAT       | Arabidopsis | AGRIS |
| <a href="#">Core</a>              | 1090 | + | ATTA       | Arabidopsis | AGRIS |
| <a href="#">Core</a>              | 1140 | + | ATTA       | Arabidopsis | AGRIS |
| <a href="#">Core</a>              | 1330 | + | ATTA       | Arabidopsis | AGRIS |
| <a href="#">Core</a>              | 1405 | + | ATTA       | Arabidopsis | AGRIS |
| <a href="#">Core</a>              | 1465 | - | TAAT       | Arabidopsis | AGRIS |
| <a href="#">Core</a>              | 1488 | - | TAAT       | Arabidopsis | AGRIS |
| <a href="#">Core</a>              | 159  | - | TAAT       | Arabidopsis | AGRIS |
| <a href="#">Core</a>              | 223  | - | TAAT       | Arabidopsis | AGRIS |
| <a href="#">Core</a>              | 328  | - | TAAT       | Arabidopsis | AGRIS |
| <a href="#">Core</a>              | 333  | - | TAAT       | Arabidopsis | AGRIS |
| <a href="#">Core</a>              | 557  | + | ATTA       | Arabidopsis | AGRIS |
| <a href="#">Core</a>              | 66   | + | ATTA       | Arabidopsis | AGRIS |
| <a href="#">Core</a>              | 71   | + | ATTA       | Arabidopsis | AGRIS |
| <a href="#">Core</a>              | 753  | + | ATTA       | Arabidopsis | AGRIS |
| <a href="#">Core</a>              | 774  | + | ATTA       | Arabidopsis | AGRIS |
| <a href="#">Core</a>              | 799  | + | ATTA       | Arabidopsis | AGRIS |
| <a href="#">Core</a>              | 83   | + | ATTA       | Arabidopsis | AGRIS |
| <a href="#">Core</a>              | 872  | + | ATTA       | Arabidopsis | AGRIS |
| <a href="#">Core</a>              | 907  | - | TAAT       | Arabidopsis | AGRIS |

|                               |      |   |         |                    |        |
|-------------------------------|------|---|---------|--------------------|--------|
| <a href="#">Core</a>          | 984  | + | ATTA    | Arabidopsis        | AGRIS  |
| <a href="#">DOFCOREZM</a>     | 1044 | + | AAAG    | maize              | PLACE  |
| <a href="#">DOFCOREZM</a>     | 1076 | + | AAAG    | maize              | PLACE  |
| <a href="#">DOFCOREZM</a>     | 1103 | - | CTTT    | maize              | PLACE  |
| <a href="#">DOFCOREZM</a>     | 144  | + | AAAG    | maize              | PLACE  |
| <a href="#">DOFCOREZM</a>     | 1521 | + | AAAG    | maize              | PLACE  |
| <a href="#">DOFCOREZM</a>     | 286  | - | CTTT    | maize              | PLACE  |
| <a href="#">DOFCOREZM</a>     | 39   | + | AAAG    | maize              | PLACE  |
| <a href="#">DOFCOREZM</a>     | 409  | + | AAAG    | maize              | PLACE  |
| <a href="#">DOFCOREZM</a>     | 440  | - | CTTT    | maize              | PLACE  |
| <a href="#">DOFCOREZM</a>     | 6    | + | AAAG    | maize              | PLACE  |
| <a href="#">DOFCOREZM</a>     | 656  | + | AAAG    | maize              | PLACE  |
| <a href="#">DOFCOREZM</a>     | 702  | + | AAAG    | maize              | PLACE  |
| <a href="#">DOFCOREZM</a>     | 769  | + | AAAG    | maize              | PLACE  |
| <a href="#">DOFCOREZM</a>     | 818  | + | AAAG    | maize              | PLACE  |
| <a href="#">DOFCOREZM</a>     | 941  | + | AAAG    | maize              | PLACE  |
| <a href="#">DOFCOREZM</a>     | 956  | - | CTTT    | maize              | PLACE  |
| <a href="#">DPBFCOREDCDC3</a> | 114  | - | CATGTGT | carrot/Arabidopsis | PLACE  |
| <a href="#">DPBFCOREDCDC3</a> | 1437 | + | ACACTGG | carrot/Arabidopsis | PLACE  |
| <a href="#">Dof2</a>          | 39   | + | AAAGCC  | Maize              | JASPER |
| <a href="#">Dof2</a>          | 438  | - | GGCTTT  | Maize              | JASPER |
| <a href="#">Dof2</a>          | 656  | + | AAAGCA  | Maize              | JASPER |
| <a href="#">Dof2</a>          | 702  | + | AAAGCA  | Maize              | JASPER |
| <a href="#">Dof3</a>          | 1044 | + | AAAGTA  | Maize              | JASPER |
| <a href="#">Dof3</a>          | 1076 | + | AAAGTA  | Maize              | JASPER |
| <a href="#">Dof3</a>          | 39   | + | AAAGCC  | Maize              | JASPER |
| <a href="#">Dof3</a>          | 409  | + | AAAGTG  | Maize              | JASPER |
| <a href="#">Dof3</a>          | 438  | - | GGCTTT  | Maize              | JASPER |
| <a href="#">Dof3</a>          | 656  | + | AAAGCA  | Maize              | JASPER |
| <a href="#">Dof3</a>          | 702  | + | AAAGCA  | Maize              | JASPER |
| <a href="#">EBOXBNNAPA</a>    | 1014 | + | CAATTG  | rape               | PLACE  |
| <a href="#">EBOXBNNAPA</a>    | 1014 | - | CAATTG  | rape               | PLACE  |
| <a href="#">EBOXBNNAPA</a>    | 114  | + | CATGTG  | rape               | PLACE  |
| <a href="#">EBOXBNNAPA</a>    | 114  | - | CATGTG  | rape               | PLACE  |
| <a href="#">EBOXBNNAPA</a>    | 308  | + | CATGTG  | rape               | PLACE  |
| <a href="#">EBOXBNNAPA</a>    | 308  | - | CATGTG  | rape               | PLACE  |
| <a href="#">EBOXBNNAPA</a>    | 418  | + | CATATG  | rape               | PLACE  |
| <a href="#">EBOXBNNAPA</a>    | 418  | - | CATATG  | rape               | PLACE  |
| <a href="#">EBOXBNNAPA</a>    | 486  | + | CATCTG  | rape               | PLACE  |
| <a href="#">EBOXBNNAPA</a>    | 486  | - | CATCTG  | rape               | PLACE  |
| <a href="#">EBOXBNNAPA</a>    | 599  | + | CAACTG  | rape               | PLACE  |
| <a href="#">EBOXBNNAPA</a>    | 599  | - | CAACTG  | rape               | PLACE  |
| <a href="#">EBOXBNNAPA</a>    | 624  | + | CATATG  | rape               | PLACE  |
| <a href="#">EBOXBNNAPA</a>    | 624  | - | CATATG  | rape               | PLACE  |
| <a href="#">EBOXBNNAPA</a>    | 631  | + | CATCTG  | rape               | PLACE  |

|                              |      |   |          |                                   |       |
|------------------------------|------|---|----------|-----------------------------------|-------|
| <a href="#">EBOXBNNAPA</a>   | 631  | - | CATCTG   | rape                              | PLACE |
| <a href="#">ELRECOREPCR1</a> | 35   | - | GGTCAA   | parsley/tobacco                   | PLACE |
| <a href="#">EMHVCHORD</a>    | 955  | - | ACTTTACA | barley                            | PLACE |
| <a href="#">ERELEE4</a>      | 848  | + | ATTTCAAA | tomato/carnation<br>/Lycopersicon | PLACE |
| <a href="#">ERF1</a>         | 476  | - | GGCGGC   | Arabidopsis                       | AGRIS |
| <a href="#">GATABOX</a>      | 1038 | - | TATC     | petunia/Arabidop<br>sis/rice      | PLACE |
| <a href="#">GATABOX</a>      | 1038 | - | TATC     | petunia/Arabidop<br>sis/rice      | PLACE |
| <a href="#">GATABOX</a>      | 1038 | - | TATC     | petunia/Arabidop<br>sis/rice      | PLACE |
| <a href="#">GATABOX</a>      | 157  | + | GATA     | petunia/Arabidop<br>sis/rice      | PLACE |
| <a href="#">GATABOX</a>      | 157  | + | GATA     | petunia/Arabidop<br>sis/rice      | PLACE |
| <a href="#">GATABOX</a>      | 157  | + | GATA     | petunia/Arabidop<br>sis/rice      | PLACE |
| <a href="#">GATABOX</a>      | 250  | - | TATC     | petunia/Arabidop<br>sis/rice      | PLACE |
| <a href="#">GATABOX</a>      | 250  | - | TATC     | petunia/Arabidop<br>sis/rice      | PLACE |
| <a href="#">GATABOX</a>      | 250  | - | TATC     | petunia/Arabidop<br>sis/rice      | PLACE |
| <a href="#">GATABOX</a>      | 322  | - | TATC     | petunia/Arabidop<br>sis/rice      | PLACE |
| <a href="#">GATABOX</a>      | 322  | - | TATC     | petunia/Arabidop<br>sis/rice      | PLACE |
| <a href="#">GATABOX</a>      | 322  | - | TATC     | petunia/Arabidop<br>sis/rice      | PLACE |
| <a href="#">GATABOX</a>      | 341  | + | GATA     | petunia/Arabidop<br>sis/rice      | PLACE |
| <a href="#">GATABOX</a>      | 341  | + | GATA     | petunia/Arabidop<br>sis/rice      | PLACE |
| <a href="#">GATABOX</a>      | 341  | + | GATA     | petunia/Arabidop<br>sis/rice      | PLACE |
| <a href="#">GATABOX</a>      | 379  | + | GATA     | petunia/Arabidop<br>sis/rice      | PLACE |
| <a href="#">GATABOX</a>      | 379  | + | GATA     | petunia/Arabidop<br>sis/rice      | PLACE |
| <a href="#">GATABOX</a>      | 379  | + | GATA     | petunia/Arabidop<br>sis/rice      | PLACE |
| <a href="#">GATABOX</a>      | 708  | + | GATA     | petunia/Arabidop<br>sis/rice      | PLACE |
| <a href="#">GATABOX</a>      | 708  | + | GATA     | petunia/Arabidop<br>sis/rice      | PLACE |

|                              |      |   |        |                                  |       |
|------------------------------|------|---|--------|----------------------------------|-------|
| <a href="#">GATABOX</a>      | 708  | + | GATA   | petunia/Arabidopsis/rice         | PLACE |
| <a href="#">GATABOX</a>      | 746  | + | GATA   | petunia/Arabidopsis/rice         | PLACE |
| <a href="#">GATABOX</a>      | 746  | + | GATA   | petunia/Arabidopsis/rice         | PLACE |
| <a href="#">GATABOX</a>      | 746  | + | GATA   | petunia/Arabidopsis/rice         | PLACE |
| <a href="#">GATABOX</a>      | 761  | + | GATA   | petunia/Arabidopsis/rice         | PLACE |
| <a href="#">GATABOX</a>      | 761  | + | GATA   | petunia/Arabidopsis/rice         | PLACE |
| <a href="#">GATABOX</a>      | 761  | + | GATA   | petunia/Arabidopsis/rice         | PLACE |
| <a href="#">GATABOX</a>      | 766  | + | GATA   | petunia/Arabidopsis/rice         | PLACE |
| <a href="#">GATABOX</a>      | 766  | + | GATA   | petunia/Arabidopsis/rice         | PLACE |
| <a href="#">GATABOX</a>      | 766  | + | GATA   | petunia/Arabidopsis/rice         | PLACE |
| <a href="#">GATABOX</a>      | 877  | + | GATA   | petunia/Arabidopsis/rice         | PLACE |
| <a href="#">GATABOX</a>      | 877  | + | GATA   | petunia/Arabidopsis/rice         | PLACE |
| <a href="#">GATABOX</a>      | 877  | + | GATA   | petunia/Arabidopsis/rice         | PLACE |
| <a href="#">GATABOX</a>      | 885  | + | GATA   | petunia/Arabidopsis/rice         | PLACE |
| <a href="#">GATABOX</a>      | 885  | + | GATA   | petunia/Arabidopsis/rice         | PLACE |
| <a href="#">GATABOX</a>      | 885  | + | GATA   | petunia/Arabidopsis/rice         | PLACE |
| <a href="#">GBF5</a>         | 1007 | - | ATGAGT | Arabidopsis                      | AGRIS |
| <a href="#">GBF5</a>         | 900  | + | ACTCAT | Arabidopsis                      | AGRIS |
| <a href="#">GCCCORE</a>      | 476  | - | GGCGGC | Arabidopsis/tomato               | PLACE |
| <a href="#">GCCCORE</a>      | 476  | - | GGCGGC | Arabidopsis/tomato               | PLACE |
| <a href="#">GT1CONSENSUS</a> | 1405 | - | ATTACC | pea/oat/rice/tobacco/Arabidopsis | PLACE |
| <a href="#">GT1CONSENSUS</a> | 1405 | - | ATTACC | pea/oat/rice/tobacco/Arabidopsis | PLACE |
| <a href="#">GT1CONSENSUS</a> | 1405 | - | ATTACC | pea/oat/rice/tobacco/Arabidopsis | PLACE |



|                              |      |   |        |                                  |       |
|------------------------------|------|---|--------|----------------------------------|-------|
| <a href="#">GT1CONSENSUS</a> | 1405 | - | ATTACC | pea/oat/rice/tobacco/Arabidopsis | PLACE |
| <a href="#">GT1CONSENSUS</a> | 157  | + | GATAAT | pea/oat/rice/tobacco/Arabidopsis | PLACE |
| <a href="#">GT1CONSENSUS</a> | 157  | + | GATAAT | pea/oat/rice/tobacco/Arabidopsis | PLACE |
| <a href="#">GT1CONSENSUS</a> | 157  | + | GATAAT | pea/oat/rice/tobacco/Arabidopsis | PLACE |
| <a href="#">GT1CONSENSUS</a> | 157  | + | GATAAT | pea/oat/rice/tobacco/Arabidopsis | PLACE |
| <a href="#">GT1CONSENSUS</a> | 313  | + | GGAAAT | pea/oat/rice/tobacco/Arabidopsis | PLACE |
| <a href="#">GT1CONSENSUS</a> | 313  | + | GGAAAT | pea/oat/rice/tobacco/Arabidopsis | PLACE |
| <a href="#">GT1CONSENSUS</a> | 313  | + | GGAAAT | pea/oat/rice/tobacco/Arabidopsis | PLACE |
| <a href="#">GT1CONSENSUS</a> | 313  | + | GGAAAT | pea/oat/rice/tobacco/Arabidopsis | PLACE |
| <a href="#">GT1CONSENSUS</a> | 390  | + | GGAAAA | pea/oat/rice/tobacco/Arabidopsis | PLACE |
| <a href="#">GT1CONSENSUS</a> | 390  | + | GGAAAA | pea/oat/rice/tobacco/Arabidopsis | PLACE |
| <a href="#">GT1CONSENSUS</a> | 390  | + | GGAAAA | pea/oat/rice/tobacco/Arabidopsis | PLACE |
| <a href="#">GT1CONSENSUS</a> | 390  | + | GGAAAA | pea/oat/rice/tobacco/Arabidopsis | PLACE |
| <a href="#">GT1CONSENSUS</a> | 391  | + | GAAAAT | pea/oat/rice/tobacco/Arabidopsis | PLACE |
| <a href="#">GT1CONSENSUS</a> | 391  | + | GAAAAT | pea/oat/rice/tobacco/Arabidopsis | PLACE |

|                              |     |   |        |                                  |       |
|------------------------------|-----|---|--------|----------------------------------|-------|
| <a href="#">GT1CONSENSUS</a> | 391 | + | GAAAAT | pea/oat/rice/tobacco/Arabidopsis | PLACE |
| <a href="#">GT1CONSENSUS</a> | 391 | + | GAAAAT | pea/oat/rice/tobacco/Arabidopsis | PLACE |
| <a href="#">GT1CONSENSUS</a> | 536 | - | ATTTTC | pea/oat/rice/tobacco/Arabidopsis | PLACE |
| <a href="#">GT1CONSENSUS</a> | 536 | - | ATTTTC | pea/oat/rice/tobacco/Arabidopsis | PLACE |
| <a href="#">GT1CONSENSUS</a> | 536 | - | ATTTTC | pea/oat/rice/tobacco/Arabidopsis | PLACE |
| <a href="#">GT1CONSENSUS</a> | 536 | - | ATTTTC | pea/oat/rice/tobacco/Arabidopsis | PLACE |
| <a href="#">GT1CONSENSUS</a> | 619 | - | TTTTTC | pea/oat/rice/tobacco/Arabidopsis | PLACE |
| <a href="#">GT1CONSENSUS</a> | 619 | - | TTTTTC | pea/oat/rice/tobacco/Arabidopsis | PLACE |
| <a href="#">GT1CONSENSUS</a> | 619 | - | TTTTTC | pea/oat/rice/tobacco/Arabidopsis | PLACE |
| <a href="#">GT1CONSENSUS</a> | 619 | - | TTTTTC | pea/oat/rice/tobacco/Arabidopsis | PLACE |
| <a href="#">GT1CONSENSUS</a> | 766 | + | GATAAA | pea/oat/rice/tobacco/Arabidopsis | PLACE |
| <a href="#">GT1CONSENSUS</a> | 766 | + | GATAAA | pea/oat/rice/tobacco/Arabidopsis | PLACE |
| <a href="#">GT1CONSENSUS</a> | 766 | + | GATAAA | pea/oat/rice/tobacco/Arabidopsis | PLACE |
| <a href="#">GT1CONSENSUS</a> | 766 | + | GATAAA | pea/oat/rice/tobacco/Arabidopsis | PLACE |
| <a href="#">GT1CONSENSUS</a> | 826 | - | ATTTTC | pea/oat/rice/tobacco/Arabidopsis | PLACE |

|                                 |      |   |                  |                                  |        |
|---------------------------------|------|---|------------------|----------------------------------|--------|
| <a href="#">GT1CONSENSUS</a>    | 826  | - | ATTTTC           | pea/oat/rice/tobacco/Arabidopsis | PLACE  |
| <a href="#">GT1CONSENSUS</a>    | 826  | - | ATTTTC           | pea/oat/rice/tobacco/Arabidopsis | PLACE  |
| <a href="#">GT1CONSENSUS</a>    | 826  | - | ATTTTC           | pea/oat/rice/tobacco/Arabidopsis | PLACE  |
| <a href="#">GT1CORE</a>         | 840  | + | GGTTAA           | pea                              | PLACE  |
| <a href="#">GT1GMSCAM4</a>      | 619  | - | TTTTTC           | soybean                          | PLACE  |
| <a href="#">HMG-1</a>           | 1444 | - | AATCACACC        | Pea                              | JASPER |
| <a href="#">HMG-1</a>           | 644  | - | AAACAAGAC        | Pea                              | JASPER |
| <a href="#">HMG-1</a>           | 690  | - | GAAGAAGAC        | Pea                              | JASPER |
| <a href="#">HMG-IY</a>          | 282  | - | GTTTCTTTGTTTGTGC | Pea                              | JASPER |
| <a href="#">HMG-IY</a>          | 689  | + | TGAAGAAGACAAAAAA | Pea                              | JASPER |
| <a href="#">HMG-IY</a>          | 892  | - | TTGATGTCACTCATGT | Pea                              | JASPER |
| <a href="#">INRNTPSADB</a>      | 314  | - | GAAATGAA         | tobacco                          | PLACE  |
| <a href="#">INRNTPSADB</a>      | 393  | - | AAATTGAA         | tobacco                          | PLACE  |
| <a href="#">INRNTPSADB</a>      | 823  | + | TTCATTTT         | tobacco                          | PLACE  |
| <a href="#">INRNTPSADB</a>      | 853  | - | AAATTGAA         | tobacco                          | PLACE  |
| <a href="#">LTRECOREATCOR15</a> | 192  | - | GTCGG            | Arabidopsis/rape                 | PLACE  |
| <a href="#">LTRECOREATCOR15</a> | 192  | - | GTCGG            | Arabidopsis/rape                 | PLACE  |
| <a href="#">MNB1A</a>           | 1044 | + | AAAGT            | Maize                            | JASPER |
| <a href="#">MNB1A</a>           | 1076 | + | AAAGT            | Maize                            | JASPER |
| <a href="#">MNB1A</a>           | 1102 | - | ACTTT            | Maize                            | JASPER |
| <a href="#">MNB1A</a>           | 1521 | + | AAAGA            | Maize                            | JASPER |
| <a href="#">MNB1A</a>           | 285  | - | TCTTT            | Maize                            | JASPER |
| <a href="#">MNB1A</a>           | 39   | + | AAAGC            | Maize                            | JASPER |
| <a href="#">MNB1A</a>           | 409  | + | AAAGT            | Maize                            | JASPER |
| <a href="#">MNB1A</a>           | 439  | - | GCTTT            | Maize                            | JASPER |
| <a href="#">MNB1A</a>           | 6    | + | AAAGA            | Maize                            | JASPER |
| <a href="#">MNB1A</a>           | 656  | + | AAAGC            | Maize                            | JASPER |
| <a href="#">MNB1A</a>           | 702  | + | AAAGC            | Maize                            | JASPER |
| <a href="#">MNB1A</a>           | 818  | + | AAAGA            | Maize                            | JASPER |
| <a href="#">MNB1A</a>           | 955  | - | ACTTT            | Maize                            | JASPER |
| <a href="#">MYB.ph3</a>         | 1027 | + | TAACAGTTT        | Petunia                          | JASPER |
| <a href="#">MYB.ph3</a>         | 1027 | - | TAACAGTTT        | Petunia                          | JASPER |
| <a href="#">MYB.ph3</a>         | 1081 | - | AGACAGTTA        | Petunia                          | JASPER |
| <a href="#">MYB.ph3</a>         | 1106 | + | TAACAATTT        | Petunia                          | JASPER |
| <a href="#">MYB.ph3</a>         | 1128 | + | TAACAATCT        | Petunia                          | JASPER |
| <a href="#">MYB.ph3</a>         | 1161 | + | TAACAGTCT        | Petunia                          | JASPER |
| <a href="#">MYB.ph3</a>         | 1178 | + | TAACTGTTA        | Petunia                          | JASPER |

|                                 |      |   |            |                     |        |
|---------------------------------|------|---|------------|---------------------|--------|
| <a href="#">MYB.ph3</a>         | 1178 | - | TAACGTGTTA | Petunia             | JASPER |
| <a href="#">MYB.ph3</a>         | 673  | + | TAACAGTTA  | Petunia             | JASPER |
| <a href="#">MYB.ph3</a>         | 673  | - | TAACAGTTA  | Petunia             | JASPER |
| <a href="#">MYB.ph3</a>         | 719  | + | TAACAGTTA  | Petunia             | JASPER |
| <a href="#">MYB.ph3</a>         | 719  | - | TAACAGTTA  | Petunia             | JASPER |
| <a href="#">MYB.ph3</a>         | 790  | + | TAACAGTTT  | Petunia             | JASPER |
| <a href="#">MYB.ph3</a>         | 790  | - | TAACAGTTT  | Petunia             | JASPER |
| <a href="#">MYB.ph3</a>         | 798  | - | TATTAGTTT  | Petunia             | JASPER |
| <a href="#">MYB.ph3</a>         | 927  | + | TAACAATCA  | Petunia             | JASPER |
| <a href="#">MYB.ph3</a>         | 983  | - | AATTAGTTA  | Petunia             | JASPER |
| <a href="#">MYB1AT</a>          | 1411 | + | AAACCA     | Arabidopsis         | PLACE  |
| <a href="#">MYB1AT</a>          | 546  | - | TGGTTT     | Arabidopsis         | PLACE  |
| <a href="#">MYB2AT</a>          | 1084 | - | CAGTTA     | Arabidopsis         | PLACE  |
| <a href="#">MYB2AT</a>          | 1178 | + | TAACGTG    | Arabidopsis         | PLACE  |
| <a href="#">MYB2AT</a>          | 271  | + | TAACGTG    | Arabidopsis         | PLACE  |
| <a href="#">MYB2AT</a>          | 676  | - | CAGTTA     | Arabidopsis         | PLACE  |
| <a href="#">MYB2AT</a>          | 722  | - | CAGTTA     | Arabidopsis         | PLACE  |
| <a href="#">MYB2CONSENSUSAT</a> | 1084 | - | CAGTTA     | Arabidopsis         | PLACE  |
| <a href="#">MYB2CONSENSUSAT</a> | 1178 | + | TAACGTG    | Arabidopsis         | PLACE  |
| <a href="#">MYB2CONSENSUSAT</a> | 271  | + | TAACGTG    | Arabidopsis         | PLACE  |
| <a href="#">MYB2CONSENSUSAT</a> | 29   | + | CAACGG     | Arabidopsis         | PLACE  |
| <a href="#">MYB2CONSENSUSAT</a> | 599  | + | CAACTG     | Arabidopsis         | PLACE  |
| <a href="#">MYB2CONSENSUSAT</a> | 676  | - | CAGTTA     | Arabidopsis         | PLACE  |
| <a href="#">MYB2CONSENSUSAT</a> | 722  | - | CAGTTA     | Arabidopsis         | PLACE  |
| <a href="#">MYB4</a>            | 1368 | + | AACAACC    | Arabidopsis         | AGRIS  |
| <a href="#">MYB4</a>            | 1408 | + | ACCAAAC    | Arabidopsis         | AGRIS  |
| <a href="#">MYB4</a>            | 543  | - | GGTTGGT    | Arabidopsis         | AGRIS  |
| <a href="#">MYBCOREATCYCB1</a>  | 30   | + | AACGG      | Arabidopsis         | PLACE  |
| <a href="#">MYBCORE</a>         | 1027 | - | TAACAG     | Arabidopsis/petunia | PLACE  |
| <a href="#">MYBCORE</a>         | 1027 | - | TAACAG     | Arabidopsis/petunia | PLACE  |
| <a href="#">MYBCORE</a>         | 1084 | + | CAGTTA     | Arabidopsis/petunia | PLACE  |
| <a href="#">MYBCORE</a>         | 1084 | + | CAGTTA     | Arabidopsis/petunia | PLACE  |
| <a href="#">MYBCORE</a>         | 1161 | - | TAACAG     | Arabidopsis/petunia | PLACE  |
| <a href="#">MYBCORE</a>         | 1161 | - | TAACAG     | Arabidopsis/petunia | PLACE  |
| <a href="#">MYBCORE</a>         | 1178 | - | TAACGTG    | Arabidopsis/petunia | PLACE  |
| <a href="#">MYBCORE</a>         | 1178 | - | TAACGTG    | Arabidopsis/petunia | PLACE  |
| <a href="#">MYBCORE</a>         | 1181 | + | CTGTTA     | Arabidopsis/petunia | PLACE  |

|                          |      |   |          |                                     |       |
|--------------------------|------|---|----------|-------------------------------------|-------|
| <a href="#">MYBCORE</a>  | 1181 | + | CTGTTA   | Arabidopsis/petunia                 | PLACE |
| <a href="#">MYBCORE</a>  | 1225 | + | CTGTTG   | Arabidopsis/petunia                 | PLACE |
| <a href="#">MYBCORE</a>  | 1225 | + | CTGTTG   | Arabidopsis/petunia                 | PLACE |
| <a href="#">MYBCORE</a>  | 1502 | - | TAACAG   | Arabidopsis/petunia                 | PLACE |
| <a href="#">MYBCORE</a>  | 1502 | - | TAACAG   | Arabidopsis/petunia                 | PLACE |
| <a href="#">MYBCORE</a>  | 271  | - | TAACTG   | Arabidopsis/petunia                 | PLACE |
| <a href="#">MYBCORE</a>  | 271  | - | TAACTG   | Arabidopsis/petunia                 | PLACE |
| <a href="#">MYBCORE</a>  | 29   | - | CAACGG   | Arabidopsis/petunia                 | PLACE |
| <a href="#">MYBCORE</a>  | 29   | - | CAACGG   | Arabidopsis/petunia                 | PLACE |
| <a href="#">MYBCORE</a>  | 599  | - | CAACTG   | Arabidopsis/petunia                 | PLACE |
| <a href="#">MYBCORE</a>  | 599  | - | CAACTG   | Arabidopsis/petunia                 | PLACE |
| <a href="#">MYBCORE</a>  | 673  | - | TAACAG   | Arabidopsis/petunia                 | PLACE |
| <a href="#">MYBCORE</a>  | 673  | - | TAACAG   | Arabidopsis/petunia                 | PLACE |
| <a href="#">MYBCORE</a>  | 676  | + | CAGTTA   | Arabidopsis/petunia                 | PLACE |
| <a href="#">MYBCORE</a>  | 676  | + | CAGTTA   | Arabidopsis/petunia                 | PLACE |
| <a href="#">MYBCORE</a>  | 719  | - | TAACAG   | Arabidopsis/petunia                 | PLACE |
| <a href="#">MYBCORE</a>  | 719  | - | TAACAG   | Arabidopsis/petunia                 | PLACE |
| <a href="#">MYBCORE</a>  | 722  | + | CAGTTA   | Arabidopsis/petunia                 | PLACE |
| <a href="#">MYBCORE</a>  | 722  | + | CAGTTA   | Arabidopsis/petunia                 | PLACE |
| <a href="#">MYBCORE</a>  | 790  | - | TAACAG   | Arabidopsis/petunia                 | PLACE |
| <a href="#">MYBCORE</a>  | 790  | - | TAACAG   | Arabidopsis/petunia                 | PLACE |
| <a href="#">MYBPLANT</a> | 543  | - | GGTTGGTT | snapdragon/bean/petunia/Arabidopsis | PLACE |

|                                |      |   |          |                                         |       |
|--------------------------------|------|---|----------|-----------------------------------------|-------|
| <a href="#">MYBPLANT</a>       | 543  | - | GGTTGGTT | snapdragon/bean<br>/petunia/Arabidopsis | PLACE |
| <a href="#">MYBPLANT</a>       | 543  | - | GGTTGGTT | snapdragon/bean<br>/petunia/Arabidopsis | PLACE |
| <a href="#">MYBPLANT</a>       | 543  | - | GGTTGGTT | snapdragon/bean<br>/petunia/Arabidopsis | PLACE |
| <a href="#">MYBPZM</a>         | 196  | - | GGTAGG   | maize                                   | PLACE |
| <a href="#">MYBPZM</a>         | 543  | - | GGTTGG   | maize                                   | PLACE |
| <a href="#">MYCATERD1</a>      | 114  | + | CATGTG   | Arabidopsis                             | PLACE |
| <a href="#">MYCATERD1</a>      | 308  | + | CATGTG   | Arabidopsis                             | PLACE |
| <a href="#">MYCATRD22</a>      | 114  | - | CATGTG   | Arabidopsis                             | PLACE |
| <a href="#">MYCATRD22</a>      | 308  | - | CATGTG   | Arabidopsis                             | PLACE |
| <a href="#">MYCCONSENSUSAT</a> | 1014 | + | CAATTG   | Arabidopsis                             | PLACE |
| <a href="#">MYCCONSENSUSAT</a> | 1014 | - | CAATTG   | Arabidopsis                             | PLACE |
| <a href="#">MYCCONSENSUSAT</a> | 114  | + | CATGTG   | Arabidopsis                             | PLACE |
| <a href="#">MYCCONSENSUSAT</a> | 114  | - | CATGTG   | Arabidopsis                             | PLACE |
| <a href="#">MYCCONSENSUSAT</a> | 308  | + | CATGTG   | Arabidopsis                             | PLACE |
| <a href="#">MYCCONSENSUSAT</a> | 308  | - | CATGTG   | Arabidopsis                             | PLACE |
| <a href="#">MYCCONSENSUSAT</a> | 418  | + | CATATG   | Arabidopsis                             | PLACE |
| <a href="#">MYCCONSENSUSAT</a> | 418  | - | CATATG   | Arabidopsis                             | PLACE |
| <a href="#">MYCCONSENSUSAT</a> | 486  | + | CATCTG   | Arabidopsis                             | PLACE |
| <a href="#">MYCCONSENSUSAT</a> | 486  | - | CATCTG   | Arabidopsis                             | PLACE |
| <a href="#">MYCCONSENSUSAT</a> | 599  | + | CAACTG   | Arabidopsis                             | PLACE |
| <a href="#">MYCCONSENSUSAT</a> | 599  | - | CAACTG   | Arabidopsis                             | PLACE |
| <a href="#">MYCCONSENSUSAT</a> | 624  | + | CATATG   | Arabidopsis                             | PLACE |
| <a href="#">MYCCONSENSUSAT</a> | 624  | - | CATATG   | Arabidopsis                             | PLACE |
| <a href="#">MYCCONSENSUSAT</a> | 631  | + | CATCTG   | Arabidopsis                             | PLACE |
| <a href="#">MYCCONSENSUSAT</a> | 631  | - | CATCTG   | Arabidopsis                             | PLACE |
| <a href="#">NAPINMOTIFBN</a>   | 115  | - | ATGTGTA  | rape                                    | PLACE |
| <a href="#">NODCON1GM</a>      | 818  | + | AAAGAT   | soybean                                 | PLACE |
| <a href="#">NODCON2GM</a>      | 1522 | - | AAGAG    | soybean                                 | PLACE |
| <a href="#">NODCON2GM</a>      | 172  | + | CTCTT    | soybean                                 | PLACE |
| <a href="#">NODCON2GM</a>      | 666  | - | AAGAG    | soybean                                 | PLACE |
| <a href="#">OSE1ROOTNODULE</a> | 818  | + | AAAGAT   | bean/Medicago/s<br>oybean/Sesbania      | PLACE |
| <a href="#">OSE1ROOTNODULE</a> | 818  | + | AAAGAT   | bean/Medicago/s<br>oybean/Sesbania      | PLACE |
| <a href="#">OSE1ROOTNODULE</a> | 818  | + | AAAGAT   | bean/Medicago/s<br>oybean/Sesbania      | PLACE |

|                                |      |   |        |                                    |        |
|--------------------------------|------|---|--------|------------------------------------|--------|
| <a href="#">OSE2ROOTNODULE</a> | 1522 | - | AAGAG  | bean/Medicago/s<br>oybean/Sesbania | PLACE  |
| <a href="#">OSE2ROOTNODULE</a> | 1522 | - | AAGAG  | bean/Medicago/s<br>oybean/Sesbania | PLACE  |
| <a href="#">OSE2ROOTNODULE</a> | 1522 | - | AAGAG  | bean/Medicago/s<br>oybean/Sesbania | PLACE  |
| <a href="#">OSE2ROOTNODULE</a> | 172  | + | CTCTT  | bean/Medicago/s<br>oybean/Sesbania | PLACE  |
| <a href="#">OSE2ROOTNODULE</a> | 172  | + | CTCTT  | bean/Medicago/s<br>oybean/Sesbania | PLACE  |
| <a href="#">OSE2ROOTNODULE</a> | 172  | + | CTCTT  | bean/Medicago/s<br>oybean/Sesbania | PLACE  |
| <a href="#">OSE2ROOTNODULE</a> | 666  | - | AAGAG  | bean/Medicago/s<br>oybean/Sesbania | PLACE  |
| <a href="#">OSE2ROOTNODULE</a> | 666  | - | AAGAG  | bean/Medicago/s<br>oybean/Sesbania | PLACE  |
| <a href="#">OSE2ROOTNODULE</a> | 666  | - | AAGAG  | bean/Medicago/s<br>oybean/Sesbania | PLACE  |
| <a href="#">PBF</a>            | 1044 | + | AAAGT  | Maize                              | JASPER |
| <a href="#">PBF</a>            | 1076 | + | AAAGT  | Maize                              | JASPER |
| <a href="#">PBF</a>            | 1102 | - | ACTTT  | Maize                              | JASPER |
| <a href="#">PBF</a>            | 39   | + | AAAGC  | Maize                              | JASPER |
| <a href="#">PBF</a>            | 409  | + | AAAGT  | Maize                              | JASPER |
| <a href="#">PBF</a>            | 439  | - | GCTTT  | Maize                              | JASPER |
| <a href="#">PBF</a>            | 656  | + | AAAGC  | Maize                              | JASPER |
| <a href="#">PBF</a>            | 702  | + | AAAGC  | Maize                              | JASPER |
| <a href="#">PBF</a>            | 955  | - | ACTTT  | Maize                              | JASPER |
| <a href="#">POLASIG1</a>       | 796  | - | TTTATT | pea/rice/Arabidop<br>sis           | PLACE  |
| <a href="#">POLASIG1</a>       | 796  | - | TTTATT | pea/rice/Arabidop<br>sis           | PLACE  |
| <a href="#">POLASIG1</a>       | 796  | - | TTTATT | pea/rice/Arabidop<br>sis           | PLACE  |
| <a href="#">POLASIG3</a>       | 1055 | - | ATTATT | maize                              | PLACE  |
| <a href="#">POLASIG3</a>       | 221  | + | AATAAT | maize                              | PLACE  |
| <a href="#">POLASIG3</a>       | 326  | + | AATAAT | maize                              | PLACE  |
| <a href="#">POLLEN1LELAT52</a> | 1042 | + | AGAAA  | tomato                             | PLACE  |
| <a href="#">POLLEN1LELAT52</a> | 1074 | + | AGAAA  | tomato                             | PLACE  |

|                                       |      |   |             |                                |        |
|---------------------------------------|------|---|-------------|--------------------------------|--------|
| <a href="#">POLLEN1LELAT52</a>        | 1215 | + | AGAAA       | tomato                         | PLACE  |
| <a href="#">POLLEN1LELAT52</a>        | 1455 | - | TTTCT       | tomato                         | PLACE  |
| <a href="#">POLLEN1LELAT52</a>        | 283  | - | TTTCT       | tomato                         | PLACE  |
| <a href="#">POLLEN1LELAT52</a>        | 641  | + | AGAAA       | tomato                         | PLACE  |
| <a href="#">POLLEN1LELAT52</a>        | 89   | - | TTTCT       | tomato                         | PLACE  |
| <a href="#">PREATPRODH</a>            | 1007 | - | ATGAGT      | Arabidopsis                    | PLACE  |
| <a href="#">PREATPRODH</a>            | 900  | + | ACTCAT      | Arabidopsis                    | PLACE  |
| <a href="#">PYRIMIDINEBOXOSRAMY1A</a> | 143  | - | AAAAGG      | rice/barley                    | PLACE  |
| <a href="#">PYRIMIDINEBOXOSRAMY1A</a> | 143  | - | AAAAGG      | rice/barley                    | PLACE  |
| <a href="#">PYRIMIDINEBOXOSRAMY1A</a> | 940  | - | AAAAGG      | rice/barley                    | PLACE  |
| <a href="#">PYRIMIDINEBOXOSRAMY1A</a> | 940  | - | AAAAGG      | rice/barley                    | PLACE  |
| <a href="#">RAV1-A</a>                | 1226 | - | TGTTG       | Arabidopsis                    | AGRIS  |
| <a href="#">RAV1-A</a>                | 1245 | + | CAACA       | Arabidopsis                    | AGRIS  |
| <a href="#">RAV1-A</a>                | 1251 | + | CAACA       | Arabidopsis                    | AGRIS  |
| <a href="#">RAV1-A</a>                | 1367 | + | CAACA       | Arabidopsis                    | AGRIS  |
| <a href="#">RAV1-A</a>                | 1513 | + | CAACA       | Arabidopsis                    | AGRIS  |
| <a href="#">RAV1-A</a>                | 529  | + | CAACA       | Arabidopsis                    | AGRIS  |
| <a href="#">RAV1AAT</a>               | 1226 | - | TGTTG       | Arabidopsis                    | PLACE  |
| <a href="#">RAV1AAT</a>               | 1245 | + | CAACA       | Arabidopsis                    | PLACE  |
| <a href="#">RAV1AAT</a>               | 1251 | + | CAACA       | Arabidopsis                    | PLACE  |
| <a href="#">RAV1AAT</a>               | 1367 | + | CAACA       | Arabidopsis                    | PLACE  |
| <a href="#">RAV1AAT</a>               | 1513 | + | CAACA       | Arabidopsis                    | PLACE  |
| <a href="#">RAV1AAT</a>               | 529  | + | CAACA       | Arabidopsis                    | PLACE  |
| <a href="#">RBCSCONSENSUS</a>         | 1353 | + | AATCCAA     | tomato/petunia/t<br>obacco/pea | PLACE  |
| <a href="#">RBCSCONSENSUS</a>         | 1353 | + | AATCCAA     | tomato/petunia/t<br>obacco/pea | PLACE  |
| <a href="#">RBCSCONSENSUS</a>         | 1353 | + | AATCCAA     | tomato/petunia/t<br>obacco/pea | PLACE  |
| <a href="#">RBCSCONSENSUS</a>         | 1353 | + | AATCCAA     | tomato/petunia/t<br>obacco/pea | PLACE  |
| <a href="#">REALPHALGLHCB21</a>       | 14   | + | AACCAA      | duckweed                       | PLACE  |
| <a href="#">REALPHALGLHCB21</a>       | 545  | - | TTGGTT      | duckweed                       | PLACE  |
| <a href="#">RHERPATEXPA7</a>          | 75   | + | GCACGT      | Arabidopsis                    | PLACE  |
| <a href="#">RUNX1</a>                 | 834  | + | ATTTGAGGTTA | Arabidopsis                    | JASPER |
| <a href="#">RYREPEATBNNAPA</a>        | 295  | - | TGCATG      | rape                           | PLACE  |
| <a href="#">RYREPEATBNNAPA</a>        | 297  | + | CATGCA      | rape                           | PLACE  |
| <a href="#">RYREPEATLEGUMINBOX</a>    | 294  | - | GTGCATG     | soybean                        | PLACE  |
| <a href="#">SEF4MOTIFGM7S</a>         | 179  | - | TAAAAAC     | soybean                        | PLACE  |
| <a href="#">SEF4MOTIFGM7S</a>         | 444  | - | CAAAAAT     | soybean                        | PLACE  |
| <a href="#">SORLIP1AT</a>             | 1507 | + | GCCAC       | Arabidopsis                    | PLACE  |
| <a href="#">SORLIP2AT</a>             | 1460 | - | GGCC        | Arabidopsis                    | PLACE  |
| <a href="#">SP8BFIBSP8AIB</a>         | 273  | + | ACTGTGTA    | sweet                          | potato |
| <a href="#">SURECOREATSULTR11</a>     | 167  | + | GAGAC       | Arabidopsis                    | PLACE  |
| <a href="#">TAAAGSTKST1</a>           | 1103 | - | CTTTA       | potato                         | PLACE  |
| <a href="#">TAAAGSTKST1</a>           | 768  | + | TAAAG       | potato                         | PLACE  |
| <a href="#">TAAAGSTKST1</a>           | 956  | - | CTTTA       | potato                         | PLACE  |



|                              |      |   |          |                    |                     |
|------------------------------|------|---|----------|--------------------|---------------------|
| <a href="#">TATABOX5</a>     | 974  | + | TTATTT   | pea                | PLACE               |
| <a href="#">TGBOXATPIN2</a>  | 76   | - | CACGTT   | tomato/Arabidopsis | PLACE               |
| <a href="#">TGBOXATPIN2</a>  | 76   | - | CACGTT   | tomato/Arabidopsis | PLACE               |
| <a href="#">WBBOXPCWRKY1</a> | 1291 | + | TTTGACT  | sweet              | potato/wheat/barley |
| <a href="#">WBBOXPCWRKY1</a> | 1291 | + | TTTGACT  | sweet              | potato/wheat/barley |
| <a href="#">WBBOXPCWRKY1</a> | 35   | - | GGTCAAA  | sweet              | potato/wheat/barley |
| <a href="#">WBBOXPCWRKY1</a> | 35   | - | GGTCAAA  | sweet              | potato/wheat/barley |
| <a href="#">WBBOXPCWRKY1</a> | 935  | - | AGTCAAA  | sweet              | potato/wheat/barley |
| <a href="#">WBBOXPCWRKY1</a> | 935  | - | AGTCAAA  | sweet              | potato/wheat/barley |
| <a href="#">WBOXATNPR1</a>   | 1292 | + | TTGAC    | Arabidopsis        | PLACE               |
| <a href="#">WBOXATNPR1</a>   | 36   | - | GTCAA    | Arabidopsis        | PLACE               |
| <a href="#">WBOXATNPR1</a>   | 401  | - | GTCAA    | Arabidopsis        | PLACE               |
| <a href="#">WBOXATNPR1</a>   | 936  | - | GTCAA    | Arabidopsis        | PLACE               |
| <a href="#">WBOXHVISO1</a>   | 1293 | + | TGACT    | barley             | PLACE               |
| <a href="#">WBOXHVISO1</a>   | 400  | - | AGTCA    | barley             | PLACE               |
| <a href="#">WBOXHVISO1</a>   | 935  | - | AGTCA    | barley             | PLACE               |
| <a href="#">WBOXNTERF3</a>   | 1293 | + | TGACT    | tobacco            | PLACE               |
| <a href="#">WBOXNTERF3</a>   | 35   | - | GGTCA    | tobacco            | PLACE               |
| <a href="#">WBOXNTERF3</a>   | 400  | - | AGTCA    | tobacco            | PLACE               |
| <a href="#">WBOXNTERF3</a>   | 935  | - | AGTCA    | tobacco            | PLACE               |
| <a href="#">WRKY71OS</a>     | 1230 | - | GTCA     | rice/parsley       | PLACE               |
| <a href="#">WRKY71OS</a>     | 1293 | + | TGAC     | rice/parsley       | PLACE               |
| <a href="#">WRKY71OS</a>     | 36   | - | GTCA     | rice/parsley       | PLACE               |
| <a href="#">WRKY71OS</a>     | 401  | - | GTCA     | rice/parsley       | PLACE               |
| <a href="#">WRKY71OS</a>     | 629  | - | GTCA     | rice/parsley       | PLACE               |
| <a href="#">WRKY71OS</a>     | 897  | - | GTCA     | rice/parsley       | PLACE               |
| <a href="#">WRKY71OS</a>     | 936  | - | GTCA     | rice/parsley       | PLACE               |
| <a href="#">XYLAT</a>        | 284  | - | TTCTTTGT | Arabidopsis        | PLACE               |
|                              |      |   |          |                    |                     |
